# Supplementary material for: Interferon-induced HERC5 is evolving under positive selection and inhibits HIV-1 particle production by a novel mechanism targeting Rev/RRE-dependent RNA nuclear export
Source: PubMed Central journal article supplement (PMC4021598; doi:10.1186/1742-4690-11-27), 2014-04-03
Supplement: 1742-4690-11-27-S1.pdf [file 1742-4690-11-27-S1.pdf]

**Table S1: Analysis for positive selection in HERC5**

| <b>Nested models</b> | <b>Log-likelihood</b> | <b><math>2(\ln L_1 - \ln L_0)</math></b> | <b>Degrees of Freedom</b> | <b><math>\chi^2</math></b> |
|----------------------|-----------------------|------------------------------------------|---------------------------|----------------------------|
| <b>M8a, M8</b>       | -14212, -14193        | 38                                       | 1                         | <0.001                     |
| <b>M7, M8</b>        | -14224, -14193        | 62                                       | 2                         | <0.001                     |

| <b>Non-nested model</b> | <b>Log-likelihood</b> | <b>AIC<sub>c</sub> Score<sup>Δ</sup>:<br/><math>-2 \cdot \log L + 2p \cdot (N/N - p - 1)</math></b> | <b>Parameters</b>                                |
|-------------------------|-----------------------|-----------------------------------------------------------------------------------------------------|--------------------------------------------------|
| <b>M8a, MEC</b>         | -14212, -14003        | 28432, 28016                                                                                        | M8a: 4 free parameters<br>MEC: 5 free parameters |

<sup>Δ</sup>  $L$  represents the likelihood of the model given the data,  $p$  represents the number of free parameters and  $N$  represents the sequence length. The lower the AIC<sub>c</sub> score, the better the fit of the model to the data, and hence the model is considered more justified.

## SUPPLEMENTAL FIGURE LEGENDS

**Supplemental Figure 1: HERC5 inhibits nuclear export of HIV-1 genomic RNA.** **A**, HeLa cells were co-transfected with plasmids encoding MS2-GFP alone, MS2-GFP and NL4-3-SL, or MS2-GFP, NL4-3-SL and either flag-tagged HERC5, HERC5-C994A or HERC5- $\Delta$ RLD. Forty-eight hours post-transfection, cells were fixed, stained with anti-flag and DAPI and imaged using fluorescence confocal microscopy. **B**, Over-exposure of cells exhibiting nuclear localization of MS2-GFP. HeLa cells were co-transfected with plasmids encoding MS2-GFP and NL4-3-SL and either flag-tagged HERC5, or HERC5-C994A. Forty-eight hours post-transfection, cells were fixed, stained with anti-flag and DAPI and imaged using fluorescence confocal microscopy. Cells exhibiting nuclear localization were imaged after increased laser intensity (also see **Figure 3**).

**Supplemental Figure 2: Alignment of protein sequence for HERC5 mammalian species.**

The constraint-based multiple alignment tool (COBALT) was used to perform a progressive multiple alignment of HERC5 amino acid sequences from human, chimpanzee, gorilla, marmoset, baboon, squirrel monkey, gibbon, horse, giant panda, sheep, cow, dog and cat. Pubmed accession numbers are as follows: *Homo sapiens* ("Human") (NP\_057407.2), *Pan troglodytes* ("Chimpanzee")(XP\_003310459.1), *Gorilla gorilla gorilla* ("Gorilla") (XP\_004039179.1), *Callithrix jacchus* ("Marmoset") (XP\_002745648.1), *Papio anubis* ("Baboon") (XP\_003898997.1), *Saimiri boliviensis boliviensis* ("Squirrel monkey") (XP\_003924055.1), *Nomascus leucogenys* ("Gibbon") (XP\_003265940.1), *Equus caballus* ("Horse") (XP\_001915115.2), *Ailuropoda melanoleuca* (Giant Panda") (XP\_002913645.1), *Ovis aries* ("Sheep") (XP\_004009762.1), *Bos taurus* ("Cow") (NP\_001095465.1), *Canis lupus familiaris* ("Dog") (XP\_535652.3), *Felis catus* ("Cat") (XP\_003985249.1) (see also **Figure 6**).

**Supplemental Figure 3: Selecton results for HERC5 run on 13 HERC5 sequences with the MEC model.** Positive selection is colored in shades of yellow, neutral selection in white, and purifying selection in shades of magenta. Shades of yellow (colors 1 and 2) indicate a Ka/Ks ratio  $> 1$ , white indicates a Ka/Ks ratio = 1, and shades of magenta (colors 3 through 7) indicate a Ka/Ks ratio  $< 1$  (see also **Figure 6**).

**A**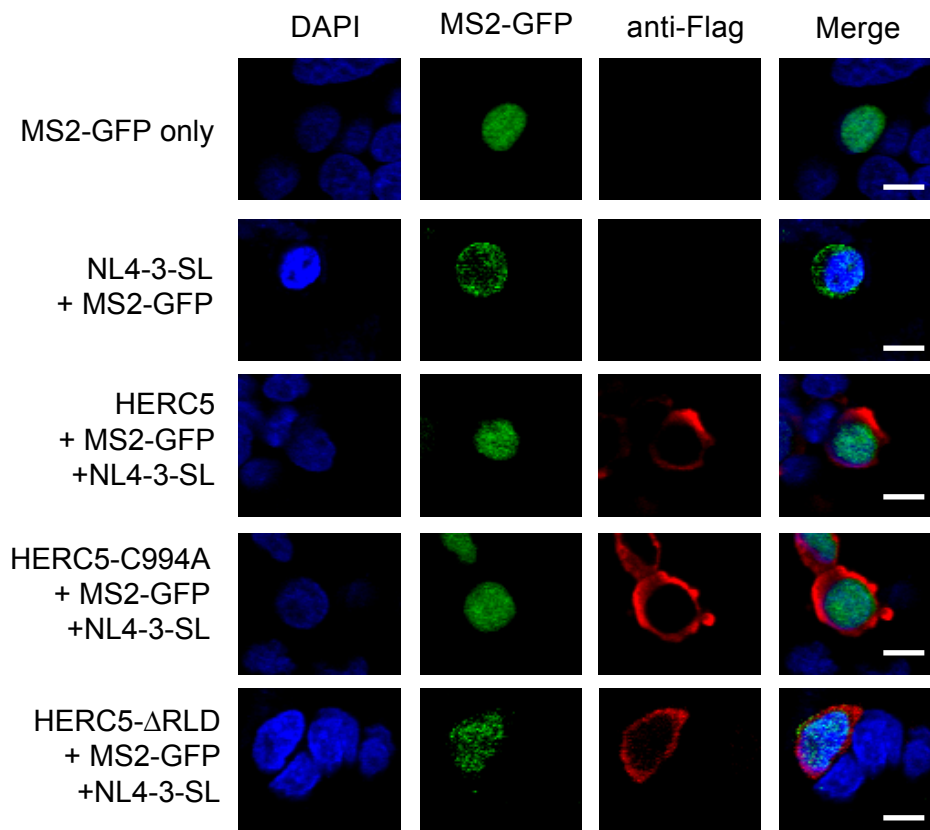**B**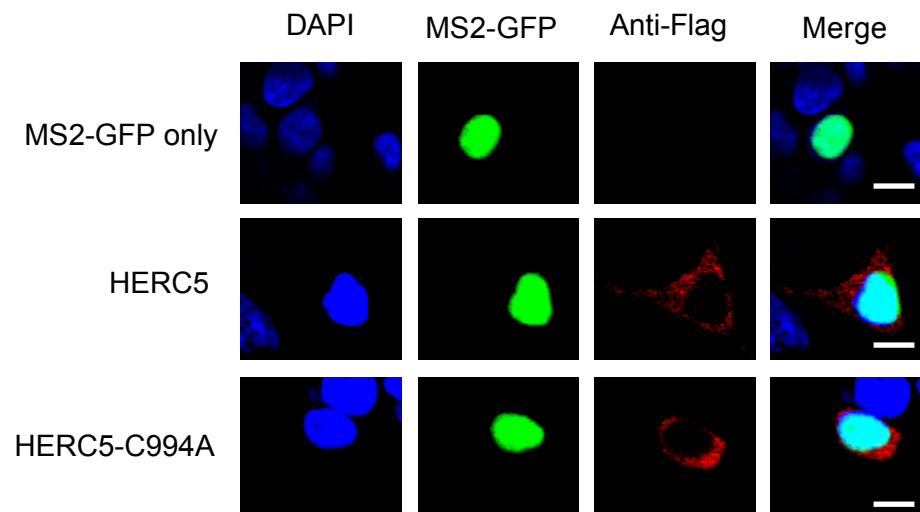

Supplementary Figure 1

## Supplemental Data

Figure S2: Alignment of protein sequences for HERC5 mammalian species.

|                                     |                                 |    |                                                                                       |                                                        |           |          |             |     |
|-------------------------------------|---------------------------------|----|---------------------------------------------------------------------------------------|--------------------------------------------------------|-----------|----------|-------------|-----|
| <input type="checkbox"/>            | <a href="#">HUMAN</a>           | 1  | MERRSRKSRNRGRSTAGKAAAT                                                                | QPAKSPGAQL                                             | WLFPSAAGL | HRALLRRV | EVTRQLCCSP  | 60  |
| <input checked="" type="checkbox"/> | <a href="#">CHIMPANZEE</a>      | 1  | MERRSRKSRNRGRSTAG-----                                                                | KAAASQPAK-                                             | -----     | -----    | -----SP     | 29  |
| <input checked="" type="checkbox"/> | <a href="#">GORILLA</a>         | 1  | MERRSRKSRNRGRSTAGKAAAS                                                                | QPAKSPGAQL                                             | WLFPSAAGL | HRALLRRA | EVTRQLCCSP  | 60  |
| <input checked="" type="checkbox"/> | <a href="#">MARMOSET</a>        | 1  | MERRSGRKSRRDRRSVAGQAAAS                                                               | QPAKSPGAQL                                             | WLPSTAGL  | RRALLRSV | EATRQICCSS  | 60  |
| <input checked="" type="checkbox"/> | <a href="#">BABOON</a>          | 1  | MERRSRKSRNRGRSTAGQTAAS                                                                | QPAKSPDAQL                                             | WLFPSAAGF | YRALLRRA | EVTRQICCSSP | 60  |
| <input checked="" type="checkbox"/> | <a href="#">SQUIRREL MONKEY</a> | 1  | MERRSRKSRNRDRRSVAGRAAAS                                                               | QPAKSPGAQL                                             | WLPSTAGL  | RRTLLRRV | EATRQICCSS  | 60  |
| <input checked="" type="checkbox"/> | <a href="#">GIBBON</a>          | 1  | MERRSRKSRNRGRSTAGAAAAS                                                                | QPAKSPGAQL                                             | WLFPSAAGF | HRALLRRA | EVTRQICCSSP | 60  |
| <input checked="" type="checkbox"/> | <a href="#">HORSE</a>           | 1  | -----                                                                                 | -----                                                  | -----     | -----    | -----MYCTR  | 5   |
| <input checked="" type="checkbox"/> | <a href="#">PANDA</a>           | 1  | [ 4] PRRRARG----GVRPVSGVP--[ 3] PPXXXXXXXXX[ 1] WLFPSAAGL                             |                                                        |           | RRALSQRM | EATRQMCCTR  | 62  |
| <input checked="" type="checkbox"/> | <a href="#">SHEEP</a>           | 1  | [ 4] PRRRSRG----GARPVSGRVPES[ 1] PSASRPSASR[14] WLFPSAAGL                             |                                                        |           | RSALSKRP | EATRQMCCTR  | 75  |
| <input checked="" type="checkbox"/> | <a href="#">COW</a>             | 1  | [ 4] PRRRSRG----GARVPGRVSES[ 1] PPASRPSA--[11] WLFPSAAGL                              |                                                        |           | RSALSKRP | EATRQMCCTR  | 70  |
| <input checked="" type="checkbox"/> | <a href="#">DOG</a>             | 1  | [236] PRRRARG----GARPAPGPRPAP[ 1] RPAEPPGTQL                                          | WLFPSAAGL                                              |           | RRALPPRA | EVAGADGAR   | 293 |
| <input checked="" type="checkbox"/> | <a href="#">CAT</a>             | 1  | [ 32] PKPLSTGVQVAKARPGTPPQPCP[15] PPKQHVASPA[ 1] ELGRSRGGY[65] RRFEPQRX[6] EATRQMCCTR |                                                        |           |          |             | 179 |
| <input checked="" type="checkbox"/> | <a href="#">HUMAN</a>           | 61 | GRL---AVLE--RGGAGVQVHQLL                                                              | AGSGGA-RTPKCIKLGKNMKIHSVDQGAE-HMLILSSDGKPF EYDnYSMKHLR |           |          |             | 130 |
| <input checked="" type="checkbox"/> | <a href="#">CHIMPANZEE</a>      | 30 | GTQ---LWLF--PSAAGLQ--RAL                                                              | LRRVEV-TRQLCCSPGRLAVLERGGAGVQvHQLLAGSGG-----           |           |          |             | 84  |
| <input checked="" type="checkbox"/> | <a href="#">GORILLA</a>         | 61 | GRL---AVLE--RGGAGVQVHQLL                                                              | AGSGGA-RTPKCIKLGKNMKIHSVDQGAE-HMLILSSDGKPF EYDnYSMKHLR |           |          |             | 130 |
| <input checked="" type="checkbox"/> | <a href="#">MARMOSET</a>        | 61 | GRL---AFLE--RGGAGVQVHQLL                                                              | PGSDGL-RTPKCIKLGKNMKIHSMDLGAD-HMLILSSDGKPF EYDnYSMKHLR |           |          |             | 130 |
| <input checked="" type="checkbox"/> | <a href="#">BABOON</a>          | 61 | RRL---AVLE--RGGAGVQVHQLL                                                              | AGSGGA-RTPKCIKLGKNMKIHSVDQGAD-HMLILSSDGKPF EYDnYSMKHLR |           |          |             | 129 |
| <input checked="" type="checkbox"/> | <a href="#">SQUIRREL MONKEY</a> | 61 | GRL---AFLE--RGGAGVQVHQLL                                                              | PGSDGL-RTPKCIKLGKNMKIHSMDLGAD-HMLILSSDGKPF EYDnYSMKHLR |           |          |             | 130 |
| <input checked="" type="checkbox"/> | <a href="#">GIBBON</a>          | 61 | GRL---AVLE--RGGAVVQVHQLL                                                              | PGSGGA-RTPKCIKLGKNMKIHSVDQGAE-HMLILSSDGKPF EYDnYSMKHLR |           |          |             | 130 |

|                                     |                                 |     |                                                                                   |     |
|-------------------------------------|---------------------------------|-----|-----------------------------------------------------------------------------------|-----|
| <input checked="" type="checkbox"/> | <a href="#">HORSE</a>           | 6   | GRL---AVLE--RAGAGXPVLXL-[1]AGSDGT-RKPKCIKLGKMKIHSMDQGAE-HLLVLSSDGKPFYEYN-YSIEHAR  | 74  |
| <input checked="" type="checkbox"/> | <a href="#">PANDA</a>           | 63  | GRL---VVLE--RGGAGVEVHQLX[9]AGGDPT1QRPACVKLGKMKIHSVDQGAE-HMLILSSDGKPFYEYN-YSIEHAR  | 141 |
| <input checked="" type="checkbox"/> | <a href="#">SHEEP</a>           | 76  | RRL---AVLE--RGGAGVEVHQL-[1]AGSDGA-RKPKCIKLGKMKIHSMDQGEE-HMLVLSSDGKPFYEYK-YSIEHAR  | 144 |
| <input checked="" type="checkbox"/> | <a href="#">COW</a>             | 71  | RRL---AVLE--RGGAGVEVHQL-[1]AGSDGA-RKPKCIKLGKMKIHSMDQGEE-HMLVLSSDGKPFYEYK-YSIEHAR  | 139 |
| <input checked="" type="checkbox"/> | <a href="#">DOG</a>             | 294 | SRQpwpVGLEglEGLEGLPWRLR[3]--SYSpDSRECIKLGKMKIHSVDQGAE-HMLILSSDGKPFYEYN-YSIEHAR    | 369 |
| <input checked="" type="checkbox"/> | <a href="#">CAT</a>             | 180 | GRL---VVLE--RGGAGVEVHQL-[1]AGSDGT-RKPKCIKLGKMKIHSVDQGAE-YMLILSSDGKPFYEYN-YSIEHAR  | 248 |
| <input checked="" type="checkbox"/> | <a href="#">HUMAN</a>           | 131 | FESILQEKKIIQITCGDYHSLALSKEGELFAWGQNLHGQLGVGRKFPSTTTPQIVEHLAGVPLAQISAGEAHSMALSMMSG | 210 |
| <input checked="" type="checkbox"/> | <a href="#">CHIMPANZEE</a>      | 85  | -----ARTPSGELFAWGQNLHGQLGVGRKFPSTTTPQIVEHLAGVPLAQISAGEAHSMALSMMSG                 | 143 |
| <input checked="" type="checkbox"/> | <a href="#">GORILLA</a>         | 131 | FENVLQEKKIIQITCGDYHSLALSKEGELFAWGQNLHGQLGVGRKFPSTTTPQIVEHLAGVPLAQISAGEAHSMALSMMSG | 210 |
| <input checked="" type="checkbox"/> | <a href="#">MARMOSET</a>        | 131 | FESILQEKKIIQITCGDYHSLALSKEGELFAWGQNLHGQLGVGRKFPSTTAPQIVEHLAGIPLAQISAGEAHSMALSMMSG | 210 |
| <input checked="" type="checkbox"/> | <a href="#">BABOON</a>          | 130 | SESILQEKKIIQITCGDYHSLALSKEGELFAWGQNLHGQLGVGRKFPSTTTPQIVEHLAGVPLAQISAGEAHSMALSMMSG | 209 |
| <input checked="" type="checkbox"/> | <a href="#">SQUIRREL MONKEY</a> | 131 | FESILQEKKIIQITCGDYHSLALSKEGELFAWGQNLHGQLGVGRKFPSTTTPQIVEHLSGIPLAQISAGEAHSMALSMMSG | 210 |
| <input checked="" type="checkbox"/> | <a href="#">GIBBON</a>          | 131 | FESILQEKKIIQITCGDYHSLALSKEGELFAWGQNLHGQLGVGRKFPSTTTPQIVEHLAGVPLAQISAGEAHSMALSMMSG | 210 |
| <input checked="" type="checkbox"/> | <a href="#">HORSE</a>           | 75  | FQCVLQEKNIIQITCGDYHSLALSKEGELFAWGQNTYQQLGVGRTFASPTTPQIVEHLSGVPLVQISAGEAHSMALSMRSR | 154 |
| <input checked="" type="checkbox"/> | <a href="#">PANDA</a>           | 142 | FQCILQEKSIIQIACGDYHSLALSKEGELFAWGQNLHGQLGVGRLFASIPTPQAVEHLSGVPLVQISAGKAHSMALSMMSG | 221 |
| <input checked="" type="checkbox"/> | <a href="#">SHEEP</a>           | 145 | FQCILQEKNIIQITCGDYHSLALSKEGELFAWGQNLHGQLGVGRIFASTSTPEIVENLSGVPLVQISAGEAHSMALSMMSG | 224 |
| <input checked="" type="checkbox"/> | <a href="#">COW</a>             | 140 | FQCILQEKNIIQITCGDYHSLALSKEGELFAWGQNLHGQLGVGRIFASTSTPEIVENLSGVPLVQISAGEAHSMALSMMSG | 219 |
| <input checked="" type="checkbox"/> | <a href="#">DOG</a>             | 370 | FQCILQEKSIIQITCGDYHSLALSKEGELFAWGQNLHGQLGVGRIFASTSTPEIVENLSGVPLVQISAGKAHSMALSMMSG | 449 |
| <input checked="" type="checkbox"/> | <a href="#">CAT</a>             | 249 | FQCILQEKNIIQITCGDYHSLALSKEGELFAWGQNLHGQLGIGSQFASIAIPQIVENLSGIPLVQISAGKAHSMALSMMSG | 328 |
| <input checked="" type="checkbox"/> | <a href="#">HUMAN</a>           | 211 | NIYSWGKNECGQLGLGHTEKDDPSLIEGLDNQKVEFVACGGSHSALLTQDGLLFTFGAGKHGQLGHNSTQNELRPLVA    | 290 |

|                                                                                     |                        |     |                                                                                      |     |
|-------------------------------------------------------------------------------------|------------------------|-----|--------------------------------------------------------------------------------------|-----|
|    | <u>CHIMPANZEE</u>      | 144 | NIYSWGKNEFGQLGLGHTE SKDYPSLIEGLDNQKVEFVACGGSHSALLTQDGLLFTFGAGKHGQLGHNSTQNELRPCLVA    | 223 |
|    | <u>GORILLA</u>         | 211 | NIYSWGKNEFGQLGLGHTE SKDYPSLIEGLDNQKVEFVACGGSHSALLTQDGLLFTFGAGKHGQLGHNSTQNELRPCLVA    | 290 |
|    | <u>MARMOSET</u>        | 211 | NIYSWGKNEFGQLGLDHTESKDSPSLIEALDNQKVEFLACGGSHSALLTQDGLLFTFGAGKHGQLGHNSTQNELRPCLVA     | 290 |
|    | <u>BABOON</u>          | 210 | NVYSWGKNEFGQLGLGHTE SKDPSLIEALDNQKVEFLACGGSHSALLTQDGLLFTFGAGKHGQLGHNSTQNELRPCLVA     | 289 |
|    | <u>SQUIRREL MONKEY</u> | 211 | NIYSWGKNEFGQLGLDHTESKDSPSLIEALDNQKVEFLACGGSHSALLTQDGLLFTFGAGKHGQLGHNSTQNELRPCLVA     | 290 |
|    | <u>GIBBON</u>          | 211 | NIYSWGKNEFGQLGLGHTE SKDYPSLIEALDNQVEVEFLACGGSHSALLTQDGLLFTFGAGKHGQLGHNSTQNELRPCLVA   | 290 |
|    | <u>HORSE</u>           | 155 | NVYSWGRNDCGQLGLGHTNNKDSPSLIEALDNQVEVEFLACGGSHSALLTKDGLVFTFGAGKCGQLGHNSTQNELTPCLVT    | 234 |
|    | <u>PANDA</u>           | 222 | NVYSWGRNDLGQLGLGHTDGEDFPSLIETLDNQVEFLACGGSHSALLTQDGLVFTFGAGKYGQLGHNSTQNELRPRLVT      | 301 |
|    | <u>SHEEP</u>           | 225 | NVYSWGRNDCGQLGLGHTYNKDSPCSIEALDDQKVEFLACGGSHSALLTKSGLVFTFGDGKYGQLGHNSTQNELRPCLVA     | 304 |
|    | <u>COW</u>             | 220 | NVYSWGRNDCGQLGLGHTYNKESPCSIEALDDQKVEFLACGGCHSALLTKSGLVFTFGDGKYGQLGHNSTQNELRPRLVT     | 299 |
|    | <u>DOG</u>             | 450 | NIYSWGRNDLGQLGLGHTNGEDFPSLIEALDNQKVEFLACGGSHSALLTKDGLVFTFGAGKYGQLGHNSTQNELRPRLVT     | 529 |
|    | <u>CAT</u>             | 329 | NIYSWGRNDFGQLGLGHTDGKDFPSLIEALDNQKVEFLACGGSHSALLTKDGLVFTFGAGKHGQLGHNSTQNELRPRLVT     | 408 |
|    | <u>HUMAN</u>           | 291 | ELVGYRVTQIACGRWHTLAYVSDLGKVF SFGSGKDGQLGNGGTRDQLMPLPVKVSSEELKLESHTSEKELIMIAGGNQS     | 370 |
|    | <u>CHIMPANZEE</u>      | 224 | ELVEYRVTQIACGRWHTLAYVSDLGKVF SFGSGKDGQLGNGGTRDQLMPLPVKVSSEELKLESHTSEKELIMIAGGNQS     | 303 |
|  | <u>GORILLA</u>         | 291 | ELVGYRVTQIACGRWHTLAYVSDLGKVF SFGSGKDGQLGNGGTRDQLMPLPVKVSSEELKLESHTSEKELIMIAGGNQS     | 370 |
|  | <u>MARMOSET</u>        | 291 | ELAGNRVTQIACGRWHTLAYVSDLGKVF SFGSGKEGQLGNGGTRDQLIPLPMKVSSEELKLESHTSEKELIMIAGENQS     | 370 |
|  | <u>BABOON</u>          | 290 | ELVGNRVTQIACGRWHTLAYVSDLGKVF SFGSGKDGQLGNGGTRDQLIPLPVKVSSEELKLESHTSEKELIMIAGGNQS     | 369 |
|  | <u>SQUIRREL MONKEY</u> | 291 | ELAGNRVTQIACGRWHTLAYVSDLGKVF SFGSGKEGQLGNGGTRDQLIPLPMKVSSEELKLESHTSEKELIMIAGENQS     | 370 |
|  | <u>GIBBON</u>          | 291 | ELVGNRVTQIACGRWHTLAYVSDLGKVF SFGSGKDGQLGNGGTRDQLIPLPVKVSSEELKLEHTSEKELIMIAGGNQS      | 370 |
|  | <u>HORSE</u>           | 235 | ELVGKRVVTQIACGRRHHTLAYVSDLGKVF SFGSGEGGQLGNGGTHHQLIPLPMKLP SNEELKFESHTSEKELIMIAGGNQS | 314 |
|  | <u>PANDA</u>           | 302 | ELAGNRVTQIACGRRHHTLAYVSDLGKVF SFGSGKEGQLGNGGTHHQLIPLPMKLP SNEELKFESRTSDKELVMIAGGNQS  | 381 |
|  | <u>SHEEP</u>           | 305 | GLVGNRVTQIACGRQHTLAYVSDMGKVF SFGSGKEGQLGNGGTCNQLMPPRPMKLP SNEELKSESSTSVKELIMVAGGNQS  | 384 |

|                                     |                        |     |                                                                                    |                    |                       |     |
|-------------------------------------|------------------------|-----|------------------------------------------------------------------------------------|--------------------|-----------------------|-----|
| <input checked="" type="checkbox"/> | <u>COW</u>             | 300 | GLVGNRVTVQIACGRQHTLAYVSDTGKVFVSGSGKEGQLGNGGTRNQLIPRPMKLLSSEELKSESSTSVKELIMVAGGNQS  | 379                |                       |     |
| <input checked="" type="checkbox"/> | <u>DOG</u>             | 530 | ELAGNRVTQVACGRWHTLAYVSDLGKVFVSGSGKEGQLGNGGTHNQLIPLPMKLPNEELKFESRTSEKELIMIAGGNQS    | 609                |                       |     |
| <input checked="" type="checkbox"/> | <u>CAT</u>             | 409 | ELAGNRVTQIACGRQHTLAYVSDLGKVFVSGSGKEGQLGNGGTHNQLIPLPMKLPNEELTFESRASEKELIMIAGGNQS    | 488                |                       |     |
| <input checked="" type="checkbox"/> | <u>HUMAN</u>           | 371 | ILLWIKKENSIVNLKRTIPTLNEGTVKRWIADVETKRWQSTKREIQEIFSSPACTGSFLRKRRTTE MMPVYLDLNKARN   | 450                |                       |     |
| <input checked="" type="checkbox"/> | <u>CHIMPANZEE</u>      | 304 | ILLWIKKENSIVNLKRTIPTLNEGTVKRWIADVETKRWQSTKREIQEIFSSPACTGSFLRKRRTTE MMPVYLDLNKARN   | 383                |                       |     |
| <input checked="" type="checkbox"/> | <u>GORILLA</u>         | 371 | ILLWIKKENSIVNLKRTIPTLNEGTVKRWIADVETKRWQSTKREIQEIFSSPACTGGFLRKRKDEK----FSSLNFGRT    | 446                |                       |     |
| <input checked="" type="checkbox"/> | <u>MARMOSET</u>        | 371 | ILLWIKKENSIVNLRRTILTTLNEGTVKRWIADVETKRWQSTKREIQEIFSSPACTSGSFLRKRRTTEMLPVYLDLSKARN  | 450                |                       |     |
| <input checked="" type="checkbox"/> | <u>BABOON</u>          | 370 | ILLWIKKENSIVNLKRTIPTLNEGTVKRWIADVETKRWHSTKREIQEIFSSPACTGSFLRKRRTAE MMPVYLDLNKARN   | 449                |                       |     |
| <input checked="" type="checkbox"/> | <u>SQUIRREL MONKEY</u> | 371 | ILLWIKKENSIVNLRRTILTTLNEGTVKRWIADVETKRWQSTKREIQEIFSSPACTSGSFLRKRRTTE MMPVYLDLSKART | 450                |                       |     |
| <input checked="" type="checkbox"/> | <u>GIBBON</u>          | 371 | ILLWIKKENSIVNLKRTIPTLNEGTVRRWIADVETKRWQSTKREIQEIFSSPACTGSFLRKRRTTE MMPVYLDLNKARN   | 450                |                       |     |
| <input checked="" type="checkbox"/> | <u>HORSE</u>           | 315 | ILLWMEKENPYVNLRRKIPTLNEGTVKRWIADVGTKQWQNTKREIKEIFSSPACTGSFLRERITAE TMSVHLNINKARD   | 394                |                       |     |
| <input checked="" type="checkbox"/> | <u>PANDA</u>           | 382 | VLLWMEKKNPYVNLRRKIPTLNEGTVKRWIADVGTKQWQNTKREIREIFSSSACTGSFLREREAETMLIHLDLNKARN     | 461                |                       |     |
| <input checked="" type="checkbox"/> | <u>SHEEP</u>           | 385 | ILMMEKENSIVNLRRKIPTLNEGTVKRWIADVGTKQWQNTKREIREIFSSPACTGSFLRERIDGEMISIHLDLNAARN     | 464                |                       |     |
| <input checked="" type="checkbox"/> | <u>COW</u>             | 380 | ILIWMEKENSIVNLRRKIPTLNEGTVKRWIADVGTKRWQNTKREIREIFSSPACTGSFLRERIDGKMISIHLDLNTARN    | 459                |                       |     |
| <input checked="" type="checkbox"/> | <u>DOG</u>             | 610 | ILLWMGKKNPYVNLRRRIPTLNEGTVKRWIADVGTKQWQNTKREIREIFSSPACTIGSFLKERIAAETMLIHLDLNKARN   | 689                |                       |     |
| <input checked="" type="checkbox"/> | <u>CAT</u>             | 489 | ILLWMGKKNPYVNLRRKIPTLNEGTVKRWIADVGTKQWQNTKKEIREIFSSPACTGSFSRERRAAETMPVHLDLNKARN    | 568                |                       |     |
| <input checked="" type="checkbox"/> | <u>HUMAN</u>           | 451 | IFKELTQKDWITNMITTCLKDNLLKRLPFHSPQ                                                  | EALEIFFLLPECPMMHIS | NNWESLV-VPPAKVVCKMSDQ | 522 |
| <input checked="" type="checkbox"/> | <u>CHIMPANZEE</u>      | 384 | IFKELTQKDWITNMITTCLKDNLLKRLPFHSPQ                                                  | EALEIFFLLPECPVMHIS | NNWESLV-VPPAKVVCKMSDQ | 455 |
| <input checked="" type="checkbox"/> | <u>GORILLA</u>         | 447 | TAPLGVRGE----MITTCLKDNLLKRLPFHSPQ                                                  | EALEIFFLLPECPVMHIS | NNWESLV-VPPAKVVCKMSDQ | 514 |
| <input checked="" type="checkbox"/> | <u>MARMOSET</u>        | 451 | IFKELIQKDWITNTITTTCLKDNLLKRLPFHSPYQ                                                | EALEVFFLLPECPVMHNS | NNWESIV-VAFKAVCKMSDQ  | 522 |
| <input checked="" type="checkbox"/> | <u>BABOON</u>          | 450 | IFKELTQKDWITNMVTTCLKDNLLKRLPFHSPHQ                                                 | EALEVFFLLPECPVMHLS | NNWESLV-VPPAKVVCKMSDP | 521 |

|                        |     |                                                                                   |                         |                       |     |
|------------------------|-----|-----------------------------------------------------------------------------------|-------------------------|-----------------------|-----|
| <u>SQUIRREL MONKEY</u> | 451 | IFKELTQKDWITNTITTTCLKDNLLKRLPFHSPYQ                                               | EALVFFLLPECPVMHNS       | NNWESIIV-VAFKAVCKMSDQ | 522 |
| <u>GIBBON</u>          | 451 | IFKELTQKDWITNMITTTCLKDNLLKRLPFRSPQ                                                | EALVFFLLPECPVMHIS       | NNWESLV-VPFAKVCKMSDQ  | 522 |
| <u>HORSE</u>           | 395 | TFKELTQKDWITNMITTTCLRDNLIKNLPFHSPHR                                               | EALVFFLLPECPVMHDY       | NNWESLV-VPFAEAICKMSNQ | 466 |
| <u>PANDA</u>           | 462 | AFKELTQKDWIANTITTTCLKDNLLKNLPFHSPHQ [21]                                          | ESLVVPFAEVVVCAMSDQS [5] | EYWASLQdAAFIRLVQMFKRA | 560 |
| <u>SHEEP</u>           | 465 | TFKELTQKDWITNTITTSCLRDNLKLPFNSPHQ                                                 | EALVFFLLPECPVMHDS       | NNWESLV-VPFAEAVNKMNQ  | 536 |
| <u>COW</u>             | 460 | TFKELTQKDWITNTITTSCLKDNLLKLPFNSPHQ                                                | EALVFFLLPECPVMHDS       | NNWESLV-VPFAEAVCKMNDQ | 531 |
| <u>DOG</u>             | 690 | DFKELTQKDWIANMITTSLKDNLLKLPFHSPHQ [21]                                            | ESLVVPFAEAICAMSDQS [5]  | EYWASLQeAAFIRLVQMFKRA | 788 |
| <u>CAT</u>             | 569 | AFKELTQKDWIANITTTCLKDNLLKLPFHSPHQ [21]                                            | ESLVVPFAEAVCAMSNQS [5]  | EYWASLQePAFSRLVQMFKGA | 667 |
| <u>HUMAN</u>           | 523 | SSLVLEEYWATLQESTFSKLVQMFKTAVICQLD-YWDESAEENGNVQ--ALLEMLKKLHRVNQVKCQLPESIFQVDEL-L  |                         |                       | 598 |
| <u>CHIMPANZEE</u>      | 456 | SSLVLEEYWATLQESTFSKLVQMFKTAVICQLD-YWDESAEENGNVQ--ALLEMLKKLHRVNQVKCQLPESIFQVDEL-L  |                         |                       | 531 |
| <u>GORILLA</u>         | 515 | SSLVLEEYWATLQESTFSKLVQMFKTAVICQLD-YWDESAEENGNVQ--ALLEMLKKLHRVNQVKCQLPESIFQVDEL-L  |                         |                       | 590 |
| <u>MARMOSET</u>        | 523 | SSLVLEEYWATLQESTFSKLVQMFKTAVICQLD-YWENAEENGNVQ--ALLEMLKKLHRVNQMKCLLPESIFQVDEL-L   |                         |                       | 598 |
| <u>BABOON</u>          | 522 | SSLVLEEYWATLQESTFSKLVQMFKTAVV CQLD-YWDESAEENGNVQ--ALLEMLKKLHRVNQMKCQLPESIFQVDEL-L |                         |                       | 597 |
| <u>SQUIRREL MONKEY</u> | 523 | SSLVLEEYWATLQESTFSKLVQMFKTAIICQLD-YWENAEENGNVQ--ALLEMLKKLHRVNQMKCLLPESIFQVDEL-L   |                         |                       | 598 |
| <u>GIBBON</u>          | 523 | SSLVLEEHWATLQESTFSKLVQMFKTAVICQLD-YWDESAEENGNVQ--ALLEMLKKLHRVNQMKYQLPESIFQVDEL-L  |                         |                       | 598 |
| <u>HORSE</u>           | 467 | SLGVLEEYWASLQESAFSKLVQMFKRAMGAQLH-YWSESVDNSCHVR--ALLEVLKRLHRVNQSNQVQVPEVSELT      |                         |                       | 542 |
| <u>PANDA</u>           | 561 | IT-----AQLH-YWTESENN--YHvkALLEILKKLHRVNQAVCQLPENIFKINELtH                         |                         |                       | 610 |
| <u>SHEEP</u>           | 537 | MS-----RVLEeYASLKESP--FI--NLVQMFKRA-----IVAQlH                                    |                         |                       | 569 |
| <u>COW</u>             | 532 | MS-----GVLEeYASLKESI--FI--NLVQMFKRA-----VIAQlH                                    |                         |                       | 564 |
| <u>DOG</u>             | 789 | VT-----AQLH-YWTESENN--YHvkALLEILKKLHRVNQAKCQLPENIFKVNELtH                         |                         |                       | 838 |
| <u>CAT</u>             | 668 | IT-----AQLH-YWTESEDN--CHvkALLEMLRKLHRVNQAKCQLPENIFKINELtQ                         |                         |                       | 717 |



|                        |     |                                                                                    |     |
|------------------------|-----|------------------------------------------------------------------------------------|-----|
| <u>HUMAN</u>           | 599 | HRLNFFVEVCRRYLWKMTVDAS-ENV---QCCVIFSHFPPFIFNNLSKIKLLHTDTLLKIESKHKHAYLRSAAIEEERESE  | 674 |
| <u>CHIMPANZEE</u>      | 532 | HRLNFFVEVCRRYLWKMTVDTS-ENV---QCCVIFSHFPPFIFNNLSKIKLLHTDTLLKIEGKHKHAYLRSAAIEEEGESE  | 607 |
| <u>GORILLA</u>         | 591 | HRLNFFVEVCRRYLWKMTVDTS-ENV---ECCVIFSHFPPFIFNNLSKIKLLHTDTLLKIEGKHKHAYLRSAAIEEERESE  | 666 |
| <u>MARMOSET</u>        | 599 | YRLDFFVEVCRRYLWKMTVDTL-ENV---GCCVIFSHFPPFIFNNLSKIKLLRTDTLVKIQGKHKHAYFRWAAVEEERESE  | 674 |
| <u>BABOON</u>          | 598 | YRLNFFVEVCRRCLWKMTVDTS-ENA---GCWVIFSHFPPFIFNHLISKIKLLHTDTLLKIEGKHKHAYLMSAAIEEERESE | 673 |
| <u>SQUIRREL MONKEY</u> | 599 | YRLDFFVEVCRRYLWKMTVDTL-ENV---GCCVIFSHFPPFIFNNLSKIKLLRTDTLVKIQGKHKHAYFRWAAVEEERESE  | 674 |
| <u>GIBBON</u>          | 599 | HRLNFFVEVCRRYLWKMTVDTS-ENV---ECCVIFSHFPPFIFNNLSKIKLLHTDTLLKIEGKHKHAYLRSAAIEEERESE  | 674 |
| <u>HORSE</u>           | 543 | HWLDYFGDVYKRSAWKMNSDTS-RDS-----PVVFSHFPPFIFNILSKIKLLYADSLKIQEKKFRACMQLAGLVEQGGSE   | 616 |
| <u>PANDA</u>           | 611 | W-LDFYGDAYRRSAWK---INS-DASfdtQYPVIFSHFPPFIFNILSKIKLLYADSLKIQEKKFRACMQLAGLVEQGGSE   | 685 |
| <u>SHEEP</u>           | 570 | Y-----WT---ESS-ENN-----NHKALLEVLKKL-----YREKKFQACMRLAGIVDQEGSA                     | 613 |
| <u>COW</u>             | 565 | Y-----WT---ESS-ENN-----SHKALLEVLKKL-----YREKKFRACMRLAGIVDQERSA                     | 608 |
| <u>DOG</u>             | 839 | W-LDFYGDAYRRSSWK---VNS-DTSvgtQYPVIFSHFPPFIFNILSKIKLLYADSLKIQEKKFRACMRLAGIMEQGGSQ   | 913 |
| <u>CAT</u>             | 718 | W-LDFYGDAYRRSSWR---VNNlDTSvdtPYPVIFSHFPPFIFNILSKIKLLYADSLKIQEKKFRACMRLAGVVEHGRSE   | 793 |
| <u>HUMAN</u>           | 675 | FALRPTFDLTVRRNHIEDVLNQLSQFENEDLRKELWVSFSGEIGYDLGGVKKEFFYCLFAEMIQPEYGMFMYPEGASCM    | 754 |
| <u>CHIMPANZEE</u>      | 608 | FALRPTFDLTVRRNHIEDVLNQLSQFENEDLRKELWVSFSGEIGYDLGGVKKEFFYCLFAEMIQPEYGMFMYPEGASCM    | 687 |
| <u>GORILLA</u>         | 667 | FALRPTFDLTVRRNHIEDVLNQLSQFENEDLRKELWVSFSGEIGYDLGGVKKEFFYCLFAEMIQPEYGMFMYPEGGSCM    | 746 |
| <u>MARMOSET</u>        | 675 | FALLPTFDLTVRRNHIEDVLNQLSQFENEDLRKELWVSFSGEIGYDLGGVKTEFFYCLFEEMTQPEYGLFMYPEGASCM    | 754 |
| <u>BABOON</u>          | 674 | FALMPTFDLTVRRNHIEDVLNQLSQFENEDLRKELWVSFSGEIGYDLVGVKREFFYCLFEEMIQPEYGMFMYPEGASCM    | 753 |
| <u>SQUIRREL MONKEY</u> | 675 | FALLPTFDLTVRRNHIEDVLNQLSQFENEDLRKELWVSFSGEIGYDLGGVKTEFFYCLFEEMTQPEYGLFMYPEGASCM    | 754 |
| <u>GIBBON</u>          | 675 | FALRPTFDLTVRRNHIEDVLNQLSQFENEDLRKELWVSFSGEIGYDLGGVKKEFFYCLFEEMIQPEYGMFMYPEGASCM    | 754 |
| <u>HORSE</u>           | 617 | LALSSFSLTVRRSHLIEDVNLNHLNRFENEDLRRELLVVSFSGEIPLDYGGVRAEFFHCLFEELTQPEYGLFMYPEEASYM  | 696 |
| <u>PANDA</u>           | 686 | LALLPTFNLTVRRTHLIEDVLSHLSQFENEDLRRELMVVSFSGEIGHDSGGVKVEFFHCLFEEMTRPEYGMFTYPEEASYM  | 765 |

|                                     |                                 |     |                                                                                                                         |      |
|-------------------------------------|---------------------------------|-----|-------------------------------------------------------------------------------------------------------------------------|------|
| <input checked="" type="checkbox"/> | <a href="#">SHEEP</a>           | 614 | LSSLPTFNLI <del>VRRSHLIEDVFNQLNQFENEDLRRELMVSFSGEIGYDFGGVRA</del> EFFYCLFQEMTRPEYGMFTYPEEASYM                           | 693  |
| <input checked="" type="checkbox"/> | <a href="#">COW</a>             | 609 | LSSLPTFNLI <del>VRRSHLIEDVFSQLNQFENEDLRRELMVSFSGEIGYNFGGVRA</del> EFFYCLFQEMTRPEYGMFTYPEEASYM                           | 688  |
| <input checked="" type="checkbox"/> | <a href="#">DOG</a>             | 914 | LALLPTFNLT <del>VRRSHLIEDVNLHNLNQFENEDLRRELMVSFSGEIGHDSGGVKV</del> EFFHCLFEEMTRPEYGMFTYPEDASYM                          | 993  |
| <input checked="" type="checkbox"/> | <a href="#">CAT</a>             | 794 | LSSLPTFNLT <del>VRRNHLIEDVLSHLNQFENEDLRRELMVSFSGEIGHDSGGVKV</del> EFFHCLFEEMTRPEYGMFTYPEEASYM                           | 873  |
|                                     |                                 |     |                                                                                                                         |      |
| <input checked="" type="checkbox"/> | <a href="#">HUMAN</a>           | 755 | WFPVKPKFEKKRYFFFGVLCGLSLFNCNVANLPFPLALFKKLLDQMP <del>SLEDLKELSPDLGKNLQ</del> TLLDDEGDNFEEVFYI                           | 834  |
| <input checked="" type="checkbox"/> | <a href="#">CHIMPANZEE</a>      | 688 | WFPVKPKFEKKRYFFFGVLCGLSLFNCNVANLPFPLALFKKLLDQMP <del>SLEDLKELSPDLGKNLQ</del> TLLDDEGDNFEEVFYI                           | 767  |
| <input checked="" type="checkbox"/> | <a href="#">GORILLA</a>         | 747 | WFPVKPKFEKKRYFFFGVLCGLSLFNCNVANLPFPLALFKKLLDQMP <del>SLEDLKELSPVLGKNLQ</del> TLLDDEGDNFEEVFYI                           | 826  |
| <input checked="" type="checkbox"/> | <a href="#">MARMOSET</a>        | 755 | WFPVKPKFEKKRYFFFGVLCGLSLFNCSVANLPFPLALFKKLLDQMP <del>SLEDLKELSPDLGKNLQ</del> TILLDDEGDNFEEVFYI                          | 834  |
| <input checked="" type="checkbox"/> | <a href="#">BABOON</a>          | 754 | WFPVRPXIEKKRYFFFGLLCGLSLFNCNVANLPFPLALFKKLLDQMP <del>SLEDLKELSPDLGKNLQ</del> TLLDDEGDNFEEVFYI                           | 833  |
| <input checked="" type="checkbox"/> | <a href="#">SQUIRREL MONKEY</a> | 755 | WFPVKPKFEKKRYFFFGVLCGLSLFNCSVANLPFPLALFKKLLDQMP <del>SLEDLKELSPDLGKNLQ</del> TILLDDEGDNFEEVFYI                          | 834  |
| <input checked="" type="checkbox"/> | <a href="#">GIBBON</a>          | 755 | WFPVKPKFEKKRYFFFGVLCGLSLFNCNVANLPFPLALFKKLLDQMP <del>SLEDLKELSPDLGKNLQ</del> TLLDDEGDNFEEVFYI                           | 834  |
| <input checked="" type="checkbox"/> | <a href="#">HORSE</a>           | 697 | WFPVRPKFEKKS <del>YFFFGVLCGLCLFNCN</del> ANIPFPLALFKKLLDQTP <del>SLEDLKELSPVFG</del> RS <del>LQ</del> TLLDDEGEDFGEVFYI  | 776  |
| <input checked="" type="checkbox"/> | <a href="#">PANDA</a>           | 766 | WFPVRPKFEKKRYFFFGVLCGLSLFNFN <del>VANIPFPLALFKKLLN</del> QTP <del>SLEDLKELSPVLGKSLQ</del> TLLDDEGDDFGEVFYI              | 845  |
| <input checked="" type="checkbox"/> | <a href="#">SHEEP</a>           | 694 | WFPVRPKFEKKS <del>YFFFGLLCGLSLFNC</del> NVADIPFPLALFKKLLDQTP <del>SLEDLKELSPVLG</del> ES <del>LQ</del> TLLDDDGDDLEEVFHI | 773  |
| <input checked="" type="checkbox"/> | <a href="#">COW</a>             | 689 | WFPVRPKFEKKS <del>YFFFGLLCGLSLFNC</del> NVADIPFPLALFKKLLDQTP <del>SLEDLKELSPVLG</del> ES <del>LQ</del> TLLDDDGDDLEEVFHI | 768  |
| <input checked="" type="checkbox"/> | <a href="#">DOG</a>             | 994 | WFPVTPKFEKKRYFFFGVLCGLSLFNFN <del>VANIPFPLALFKKLLD</del> QTP <del>SLEDLKELSPVLGKSLQ</del> TLLDDEGDDFGEVFLI              | 1073 |
| <input checked="" type="checkbox"/> | <a href="#">CAT</a>             | 874 | WFPVRPKFEKKRYFFFGVLCGLSLFNFN <del>VANIPFPLALFKKLLN</del> QAP <del>SLEDLKELSPVLGKSLQ</del> TLLDDEGDDFGEVFYI              | 953  |
|                                     |                                 |     |                                                                                                                         |      |
| <input checked="" type="checkbox"/> | <a href="#">HUMAN</a>           | 835 | HFNVHWRNDTNLI <del>PN</del> GSSITVNQTNKR <del>DYVSKYIN</del> YIFNDSVKAVYEEFRRGFYKMCDEDI <del>IKLFHPEELKDV</del> IVGNTD  | 914  |
| <input checked="" type="checkbox"/> | <a href="#">CHIMPANZEE</a>      | 768 | HFNVHWRNDTNLI <del>PN</del> GSSITVNQTNKR <del>DYVSKYIN</del> YIFNDSVKAVYEEFRRGFYKMCDEDI <del>IKLFHPEELKDV</del> IVGNTD  | 847  |
| <input checked="" type="checkbox"/> | <a href="#">GORILLA</a>         | 827 | HFNVHWRNDTNLI <del>PN</del> GSSITVNQTNKR <del>DYVSKYIN</del> YIFNDSVKAVYEEFRRGFYKMCDEDI <del>IKLFHPEELKDV</del> IVGNTD  | 906  |
| <input checked="" type="checkbox"/> | <a href="#">MARMOSET</a>        | 835 | YFNVHWRNDTDLI <del>PN</del> GRNIIVNQTNKR <del>DYVSKYID</del> YIFNDSVKVYEEFRRGFYKMCDEEDI <del>IKLFHPEELKDV</del> IVGNTY  | 914  |

|                        |      |                                                                                        |      |
|------------------------|------|----------------------------------------------------------------------------------------|------|
| <u>BABOON</u>          | 834  | HFNVHWRNDTNLIPNGSSIIVNQTNKRDYVSKYIDYIFNDSVKAVYEEFRRGFYKMCDEDI IKLFHPEELKDVI VGH TD     | 913  |
| <u>SQUIRREL MONKEY</u> | 835  | HFNVHWRNDTDLIPNGSNIIVNQTNKRDYVSKYIDYIFNDSVKVVYEEFRRGFYKMCDEDI IKLFHPEELKDVI VGN TD     | 914  |
| <u>GIBBON</u>          | 835  | HFNVHWRNDTNLIPNGSSIIVNQTNKRDYVSKYIDYIFNDSVKAVYEEFRRGFYKMCDEDI IKLFHPEELKDVI VGN TD     | 914  |
| <u>HORSE</u>           | 777  | HFTVHWRNAAELIPNGSDIIVDQTNKRDYVSKCVNYIFNISIKAVYEEFQRGFYKVC DKEI I GFFHPAELKDVI I GN TD  | 856  |
| <u>PANDA</u>           | 846  | YFNVHWDKNDIDLIPNGSCVIVDQTNKRDYVSKCVSYIFNISVKALYEEFQRGFYKVC DKDI I EFFHPEELKDVI I GN TD | 925  |
| <u>SHEEP</u>           | 774  | HFNVHWDKNDVDLIPDGSHIIVDQTNKRDYVSKYVNYIFNISVKAVYEEFQRGFYKVC DKEI I EFFHPEQLKDVI I GN TD | 853  |
| <u>COW</u>             | 769  | HFNVHWDKNDVDLIPDGSHVIVDQTNKRDYVSKYVNYIFNISVKAVYEEFQRGFYKVC DKEI I EFFHPEQLKDVI I GN TD | 848  |
| <u>DOG</u>             | 1074 | YFNVHWDKNDVDLIPNGSGIIVDQTNKRDYVSKYVNYIFNISVKAVYEEFQRGFYKVC DKDI I EFFHPEELKDVI I GN TD | 1153 |
| <u>CAT</u>             | 954  | YFNVHWDKNDVDLIPNGRCIIVDQTNKRDYVSKCVNYIFNISVKAVYEEFQRGFYKVC EKDI I EFFHPEELKDVI VGN TD  | 1033 |
| <u>HUMAN</u>           | 915  | YDWKTFEKNARYEPGYNSSHPTIVMFWKAFHKLTL EEKKKFLVFLTGTDRLQMKDLN NMKITFCCPESWNERDPIRALTC     | 994  |
| <u>CHIMPANZEE</u>      | 848  | YDWKTFEKNARYEPGYNSSHPTIVMFWKAFHKLTL EEKKKFLVFLTGTDRLQMKDLN NMKITFCCPESWNERDPIRALTC     | 927  |
| <u>GORILLA</u>         | 907  | YDWKTFEKNARYEPGYNSSHPTIVMFWKAFHKLTL EEKKKFLVFLTGTDRLQMKDLN NMKITFCCPESWNERDPIRALTC     | 986  |
| <u>MARMOSET</u>        | 915  | YDWKTFEKNARYEPGYNSSHPTIVMFWKAFHKLTL EEKKKFLVFLTGTDRIQIKDLN NMKITFCCPENWNERDPIRALTC     | 994  |
| <u>BABOON</u>          | 914  | YDWKTFEKNARYEPGYNSSHPTIVMFWKAFHKLTL EEKKKFLVFLTGTDRLQTKDLN NMKITFCCPESWNERDPIRALTC     | 993  |
| <u>SQUIRREL MONKEY</u> | 915  | YDWKTFEKNARYEPGYNSSHPTIVMFWKAFHKLTL EEKKKFLVFLTGTDRIQMKDLN NMKITFCCPENWNERDPIRALTC     | 994  |
| <u>GIBBON</u>          | 915  | YDWKTFEKNARYEPGYNSSHPTIVMFWKAFHKLTL EEKKKFLVFLTGTDRLQMKDLN NMKITFCCPESWNERDPIRALTC     | 994  |
| <u>HORSE</u>           | 857  | YDWKTFEKNARYEPGYNSSHPTIVMFWKAFHKLTL EEKKKFLVFLTGTDRLQVKG VKNMKITFCCPEHLDEKDP IRAQTC    | 936  |
| <u>PANDA</u>           | 926  | YDWKTFEKNARYEPGYNSSHPTIVMFWKAFHKLTL EEKKKFLVFLTGTDRIQVKG VKNMKITFCCPENVNEKDP IRAQTC    | 1005 |
| <u>SHEEP</u>           | 854  | YDWKTFEKNARYEPGYNSSHPTIVMFWKAFHKLTL EEKKKFLVFLTGTDRIQVKG VKNMKITFCCPETLNEKDP IRAQTC    | 933  |
| <u>COW</u>             | 849  | YDWKTFEKNARYEPGYNSSHPTIVMFWKAFHKLTL EEKKKFLVFLTGTDRIQVKG VKNMKITFHCPENLNEKDP IRAQTC    | 928  |
| <u>DOG</u>             | 1154 | YDWKTFEKNARYEPGYNSSHPTIVMFWKAFHKLTL EEKKKFLVFLTGTDRIQVKG VKNMKITFCCPENVNEKDP IRAQTC    | 1233 |
| <u>CAT</u>             | 1034 | YDWKTFEKNARYEPGYNSSHPTIVMFWKAFHKLTL EEKKKFLVFLTGTDRIQVKG VKNMKITFCCPENMNEKDP IRAQTC    | 1113 |

|                                     |                 |      |                                 |      |
|-------------------------------------|-----------------|------|---------------------------------|------|
| <input checked="" type="checkbox"/> | HUMAN           | 995  | FSVLFLPKYSTMETVEEALQEAINNRRGFG  | 1024 |
| <input checked="" type="checkbox"/> | CHIMPANZEE      | 928  | FSILFLPKYSTMETVEEALQEAINNSRGFG  | 957  |
| <input checked="" type="checkbox"/> | <u>GORILLA</u>  | 987  | FSVLFLPKYSTMETVEEALQEAINNRRGFG  | 1016 |
| <input checked="" type="checkbox"/> | <u>MARMOSET</u> | 995  | FSVLFLPKYSTMERVEEALQVAINNRRGFG  | 1024 |
| <input checked="" type="checkbox"/> | <u>BABOON</u>   | 994  | FSVLFLPKYSTMETVEEALQVAINNRRGFG  | 1023 |
| <input checked="" type="checkbox"/> | SQUIRREL MONKEY | 995  | FSVLFLPKYSTMERVEEALQVAINNRRGFG  | 1024 |
| <input checked="" type="checkbox"/> | GIBBON          | 995  | FNVLFLLPKYSTMETVEEALQEAINNSRGFG | 1024 |
| <input checked="" type="checkbox"/> | <u>HORSE</u>    | 937  | FSVLYLPKYSTMERVEEALQVAINNRRGFG  | 966  |
| <input checked="" type="checkbox"/> | <u>PANDA</u>    | 1006 | ISVLYLPKYSTMERVEEALQVAINNSRGFG  | 1035 |
| <input checked="" type="checkbox"/> | <u>SHEEP</u>    | 934  | FSVLYLPKYSTMERVEEALQVAINNSRGFG  | 963  |
| <input checked="" type="checkbox"/> | COW             | 929  | FSVLYLPKYSTMERVEEALQVAINNSRGFG  | 958  |
| <input checked="" type="checkbox"/> | DOG             | 1234 | ISVLYLPKYSTMERVEEALQVAINNSRGFG  | 1263 |
| <input checked="" type="checkbox"/> | <u>CAT</u>      | 1114 | ISVLYLPKYSTMERVEEALQVAINNSRGFG  | 1143 |

1 11 21 31 41  
 MERRSRRKSRRNGRSTAGKAAATQPAKSPG AQLWLFPSAA GLHRAALRRV  
 51 61 71 81 91  
 EVTRQLCCSP GRLAVLERGG AGVQVHQLLA GSGGARTPKC I KLGKNMKIH  
 101 111 121 131 141  
 SVDQGAEHML ILSSDGKPF EYDNYSMKHLR FESILQEKKI IQITCGLYHS  
 151 161 171 181 191  
 LALS KGGELF AWGQNLHGQL GVGRKFPSTT TPQIV EHLAG VPLAQISAGE  
 201 211 221 231  
 AHSMA LMSG NIYSWGKNEC GQLGLGHTES KDDPSLIEGL DNQKVEFVAC  
 251 261 271 281 291  
 GGSHSALLLQ DGLLFFFGAG KHGQLGHNSI QNELR PCLVA ELVGYEVHQI  
 301 311 321 331 341  
 ACGRWHHTLAY VSDLGKVFSSF GSGKDGQLGN GGT RDQLMPL PVK VSSSEEL  
 351 361 371 381 391  
 KLESHTSEKE LIM IAGGNQS ILLWIKKENS YVNLKRTIP LNEGIVKRWI  
 401 411 421 431 441  
 ADVETKRWQS KRETQEIFS SPACLTGSFL RKRTTEMMP VYLDLNKARN  
 451 461 471 481 491  
 IFKELTQKDW HTNMITTCLK ANLLRRLPFH SPPQEALEIF FLLPECFMHI  
 501 511 521 531 541  
 ISNNWESLVV PFAKVVCKMS DQSSLVLEEY WATLQESTFS KLVQKERTAV  
 551 561 571 581 591  
 ICQLDYWDES AEENGNVQAL LEMLKKLHRV NQVKCQLPES HFQVDELLHR  
 601 611 621 631 641  
 LNFVVEVCR EYLWKMTVDAS ENVQCCVIFS HFFPIFNLS KIKLLHTDTL  
 651 661 671 681 691  
 LKIESKKHKA YLRSAATEEE RESEFALRPT EDTVRRNHL IEDVLNQLSQ  
 701 711 721 731 741  
 FENEDLRKEL WYSFSGEIGY DIGGVKKEFF YCLFAEMIQP EYGMFMYPEG  
 751 761 771 781 791  
 ASCMWFVPKP KFEKKRYFFF GVLGGLSLFN CNVANLPFPL ALFKKLLDQM  
 801 811 821 831 841  
 PSLEDLKELS PDLGKNLQLL LEEEGDNFEE VEYHENVEW DRNDTNLIPN  
 851 861 871 881 891  
 GSSITVNQEN KEDYVSKYIN YTFNDSVKAV YEEFRGFYK MCDDEDIKLF  
 901 911 921 931 941  
 HPEELKDVIV GNTDYDWKTF EKNARYEPGY NSSHP TIVME WKA FHLILE  
 951 961 971 981 991  
 EKKKFLVFLI GIDRLQMKDL NKKITTECCP ESWNERDPIR ALICFSVLFLL  
 1001 1011 1021  
 PKYSTMETVE EALQEAINNN RGGG

**Legend:**

The selection scale:

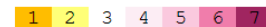

Positive selection      Purifying selection

**Box 1**

## Sequences queried

---

- NP\_057407.2 = Human
- XP\_003310459.1 = Chimpanzee
- XP\_004039179.1 = Gorilla
- XP\_002745648.1 = Marmoset
- XP\_003898997.1 = Baboon
- XP\_003924055.1 = Squirrel monkey
- XP\_003265940.1 = Gibbon
- XP\_001915115.2 = Horse
- XP\_002913645.1 = Panda
- XP\_004009762.1 = Sheep
- NP\_001095465.1 = Cow
- XP\_535652.3 = Dog
- XP\_003985249.1 = Cat
